1  
2  
3  
4  
5  
6  
7  
8  
9  
10  
11  
12  
13  
14  
15  
16  
17  
18  
19  
20  
21  
22  
23  
24  
25  
26  
27  
28  
29  
30  
31  
32  
33  
34  
35  
36  
37  
38

**A scalable culturing system for the marine annelid *Platynereis dumerilii*.**

Emily Kuehn<sup>1</sup>, Alexander W. Stockinger<sup>2</sup>, Jerome Girard<sup>1</sup>, Florian Raible<sup>2</sup>, B. Duygu Özpolat<sup>1\*</sup>

1 – Marine Biological Laboratory, Woods Hole, MA, USA

2 – Max F. Perutz Laboratories, Vienna, Austria

\*Correspondence to: B. D. Özpolat

Eugene Bell Center for Regenerative Biology and Tissue Engineering

Marine Biological Laboratory

Woods Hole, MA 02543 USA

Phone: (508) 289-7245

e-mail: [dozpolat@mbl.edu](mailto:dozpolat@mbl.edu)

url: <http://ozpolatlab.org>

39 **ABSTRACT**

40

41 *Platynereis dumerilii* is a marine segmented worm (annelid) with externally fertilized embryos  
42 and it can be cultured for the full life cycle in the laboratory. The accessibility of embryos and  
43 larvae combined with the breadth of the established molecular and functional techniques has made  
44 *P. dumerilii* an attractive model for studying development, cell lineages, cell type evolution,  
45 reproduction, regeneration, the nervous system, and behavior. Traditionally, these worms have  
46 been kept in rooms dedicated for their culture. This allows for the regulation of temperature and  
47 light cycles, which is critical to synchronizing sexual maturation. However, regulating the  
48 conditions of a whole room present limitations, especially if experiments require being able to  
49 change culturing conditions. Here we present scalable and flexible culture methods that provide  
50 ability to control the environmental conditions, and have a multi-purpose culture space. We  
51 provide a closed setup shelving design with proper light conditions necessary for *P. dumerilii* to  
52 mature. We also implemented a standardized method of feeding *P. dumerilii* cultures with  
53 powdered spirulina which relieves the ambiguity associated with using frozen spinach, and helps  
54 standardize nutrition conditions across experiments and across different labs. By using these  
55 methods, we were able to raise mature *P. dumerilii*, capable of spawning and producing viable  
56 embryos for experimentation and replenishing culture populations. These methods will allow for  
57 the further accessibility of *P. dumerilii* as a model system, and they can be adapted for other aquatic  
58 organisms.

59

60 **Keywords: Annelida, Nereididae, Spiralia, Platynereis, Aquaculture**

61

62

63

64

65

66

67

68

69

70

71

72

73

74

75

76

77

78

79

80

81

82

83

84

## 85 BACKGROUND

86  
87 Nereidid worms such as *Platynereis* have been popular in studies of development and  
88 fertilization because of transparent, abundant, and comparatively large eggs and embryos [1,2]. As  
89 researchers like Edmund Beecher Wilson did in the late 19th century, many labs today benefit  
90 from *Platynereis* as a model organism for addressing a wide range of biological questions such as  
91 cell type evolution, nervous system evo-devo and activity, reproductive periodicity, circalunar  
92 cycling, endocrinology, regeneration, post-embryonic segment addition, stem cell biology,  
93 fertilization, oocyte maturation, embryonic and larval development [3–16]. The sexual worms  
94 broadcast spawn, producing thousands of externally-developing embryos. The embryos are large  
95 enough to inject but small (about 160  $\mu\text{m}$  in diameter) and transparent enough to image live and  
96 fixed samples. *Platynereis* has a relatively quick and highly synchronized embryogenesis: it takes  
97 only 18 hours from fertilization to hatching as a planktonic trochophore larva in *P. dumerilii*  
98 [2,17]. This allows researchers to study embryonic development over the course of just one day.  
99 A number of tools and techniques are already established in *P. dumerilii* [3] including  
100 microinjection [5,12,18], transgenesis and genetic tools [18–21], single cell RNA sequencing [22],  
101 behavioral tracking [8,16], and live imaging [5]. This well-equipped tool kit combined with the  
102 large number of embryos generated by each fertilization make *P. dumerilii* an attractive model  
103 organism which can be cultured under specific laboratory conditions for its full life cycle.

104  
105 Ernest E. Just was among one of the earliest of people who tried rearing *Platynereis* in the  
106 lab at the beginning of the 20<sup>th</sup> century [23]. He studied fertilization in *Platynereis megalops*,  
107 which he collected from Great Harbor in Woods Hole [24], and wanted to have access to eggs  
108 throughout the year instead of only during the summer. In Europe, studies of *P. dumerilii* go back  
109 to early 20<sup>th</sup> century [25] at Naples Zoological Station. *P. dumerilii* cultures today are thought to  
110 mostly originate from the Bay of Naples, and have been bred in the lab since 1950s (originally by  
111 Carl Hauenschild) [2,17]. Even though resources for culturing *P. dumerilii* exist including Fischer  
112 and Dorresteijn's excellent guide online [26], these resources only provide guidelines for larger  
113 scale culturing of *Platynereis* and detailed guidelines for establishing small (but scalable) culturing  
114 are not available. For many research areas (such as physiology, behavior, aging, reproduction...) there  
115 is also the need for flexibly adjusting the environmental parameters, which is challenging  
116 with the traditional methods of culturing *P. dumerilii*. Finally, several areas for standardizing  
117 culturing methods remain to be established, especially regarding the feeding methods. This is  
118 particularly important for studying biological processes are affected dramatically by nutrition, and  
119 being able to carry out comparable experiments across different research labs.

120  
121 Here we describe a scalable, small footprint setup for culturing *P. dumerilii*, including  
122 detailed methods of light regulation, light and temperature monitoring, husbandry, and feeding.  
123 This setup, with blackout curtains and its own automatic lighting which serves as the sun and  
124 moon, removes reliance on dedicated culture rooms. It provides greater flexibility for choosing  
125 and adjusting culturing components (such as light source) and can be put together at a lower cost  
126 than similar designs that use incubators in place of a shelving unit [27]. We provide worm  
127 maturation data that can be used to scale the culture up or down, based on the number of mature  
128 worms needed. We also present standardized feeding methods we developed using powdered,  
129 commercially available nutrients such as spirulina. This homogenous suspension can be distributed  
130 throughout the culture boxes evenly. Our feeding method eliminates the ambiguity associated with

131 using fresh or frozen spinach, and will enable better comparison of data across laboratories  
132 especially for types of research, such as physiology, where diet is a particularly important factor.  
133 Finally, we present data and images of *P. dumerilii* embryos, larvae, juveniles, and adults we  
134 obtained from our cultures, and visualization of normal development, confirming the robustness  
135 of the culturing conditions.

136

## 137 **METHODS**

138

### 139 **Water Type and Filtering**

140 *P. dumerilii* embryos, larvae, juveniles and adults were kept in full strength natural filtered  
141 sea water (NFSW). The sea water was first filtered through a 1  $\mu\text{m}$  filter system in the Marine  
142 Resource Center at the Marine Biological Laboratory. The 1  $\mu\text{m}$  NFSW was used primarily for  
143 juvenile and adult culture boxes (Suppl. Fig. 1A).

144

145 For food preparation, microinjections, and culturing embryos and young larvae, sea water  
146 was filtered further via a glass graduated filtration funnel (*Pyrex*, 33971-1L) secured to a glass  
147 funnel stem (*Sigma*, Z290688) by a spring clamp (*Millipore*, xx1004703) (Suppl. Fig. 1). On top  
148 of the funnel stem, a 0.22  $\mu\text{m}$  pore size nitrocellulose membrane (*Millipore*, GSTF04700) was  
149 placed, and this membrane was covered by one piece of Whatman filter paper (*GE Healthcare*,  
150 1002055). The filter unit was placed on a glass vacuum flask (*Fisherbrand*, FB-300-4000) fitted  
151 with a rubber adapter (*Fisherbrand*, 05-888-107) so that the stem sat snugly in place (Suppl. Fig.  
152 1B).

153

### 154 **Collecting embryos for sustaining cultures**

155 To spawn mature worms, male and female worms were placed together in a small glass  
156 dish of approximately 150 mL 0.22  $\mu\text{m}$  NFSW. After spawning, worms were removed from the  
157 dish, sea water with excess sperm in the dish was discarded and replaced with clean sea water to  
158 prevent polyspermy, and embryos were kept at 18°C. Around 24 hpf, larvae were poured onto a  
159 85  $\mu\text{m}$  sieve and 0.22  $\mu\text{m}$  NFSW was poured over the embryos several times to wash the jelly off.  
160 To make a 85  $\mu\text{m}$  sieve, we cut off the conical end of a 50 mL tube (and removed the cap), stretched  
161 a 85  $\mu\text{m}$  pore mesh (*Component Supply*, U-CMN-85-A) over one of the ends of the tube, and  
162 secured the mesh with a rubber band or glue.

163

164 After the jelly was washed off, larvae were pipetted off the sieve and into a clean dish of 0.22  
165  $\mu\text{m}$  NFSW, or the sieve was flipped over an empty dish and larvae were washed into the dish.  
166 Penicillin Streptomycin (*Gibco*, 15140-122) (1:1000) was added, and the cultures were kept at  
167 18°C until 7-10 days post fertilization (dpf).

168

### 169 **Setting Up Culture Boxes – High and Low Density Populations**

170 As containers for culturing, Sterilite brand boxes made of polypropylene and polyethylene  
171 (PP5 type non-reactive plastic) were used (Fig. 1G). These boxes are non-toxic, inexpensive, come  
172 in several sizes, and have lids that can sit loosely to allow air in and out when the latches are not  
173 used. To ensure no residual chemicals or dust from production remained, the boxes were rinsed  
174 with deionized water, soaked overnight, and washed with a clean sponge without any detergent  
175 before they were used for cultures for the first time.

176

177 Healthy larvae at 7-10 dpf were transferred into Large Sterilite boxes (*Sterilite*, 1963) (no air  
178 bubbler needed at this stage), and were kept in the 18°C incubator until around 1-2 month(s) post-  
179 fertilization (around the time young juvenile worms started building tubes). At this time, these  
180 cultures were transferred from the incubator to the shelving unit to begin assimilation to the  
181 lighting schedule. These large boxes contained a high-density population of worms of about 300-  
182 350 per box. To facilitate the dispersal of oxygen throughout these cultures with growing worms,  
183 high density boxes were equipped with air bubblers (*Tetra*, Whisper Air Pump, 77846) once  
184 transferred to the shelf. Air tubes were inserted by making a hole on the lid using a hot glue gun  
185 tip (using the heat to melt the plastic, without the glue).

186  
187 Low density cultures were established a little over two months (typically at the beginning of  
188 the third month) after the worms were born. Using a paint brush, the worms were pushed gently to  
189 come out of the tubes and were collected with a pipette to be transferred to a low density box.  
190 These cultures consisted of 30 worms per small Sterilite box (*Sterilite*, 1961) in 500 mL 1- $\mu$ m-  
191 filtered natural seawater, and were not aerated.

192  
193 **Feeding *Platynereis* larvae**  
194 Depending on availability at our facilities, we used either *T-iso*, or *T. chuii*, or a mix of both algae  
195 species to feed the young *P. dumerilii* larvae (starting around 7-10 dpf). The algae cultures were  
196 kept in a room with ample natural light and/or with additional LED lights. Algae cultures were  
197 grown in glass or plastic carboys and were aerated to ensure faster growth. Algae were collected  
198 into 50 mL centrifuge tubes when cultures were seen to be dense enough (dark brown or green  
199 color, depending on the species). The tubes were then centrifuged for 10 minutes at 2000 rpm.  
200 The supernatant was discarded and the tube was refilled with additional algae stock. Centrifugation  
201 was repeated until the pellet is large enough to fill the conical part of the tube (~2.5mL). Then  
202 algae pellet was resuspended in 50 mL of 0.22  $\mu$ m NFSW. This provided concentrated algae  
203 stocks which could then be stored at 4°C for later use. During the first month of development, 25  
204 mL per large box (1.5 L water volume) of this concentrated stock was distributed using a transfer  
205 pipette, twice per week. On the second month of development, the juvenile worms were switched  
206 to the spirulina regimen (see Results and Discussion below for details).

207  
208 **Maintaining the larval and juvenile culture boxes**  
209 *Maintaining larvae:* The larvae may perish easily if water cleanliness is not maintained. To ensure  
210 optimal water cleanliness larval culture boxes were checked under the microscope regularly. If  
211 growth of protozoans was observed, water was removed using a sink-enabled vacuum through a  
212 85- $\mu$ m sieve which is large enough to let protozoa out but prevents removing small larvae. 0.22 $\mu$ m  
213 NFSW was used to culture the larvae.

214  
215 *Maintaining juveniles:* The NFSW in the culture boxes was completely replaced every two weeks  
216 with new 1.0  $\mu$ m NFSW. For boxes with juvenile worms that have already formed tubes, dirty  
217 water was poured completely into a plastic dishpan, as the worms mostly stay in tubes. Any  
218 escaped worms were transferred back into the culture box from dishpan. The dirty water was  
219 discarded into a container to which bleach was added prior to final disposal into the drain, in order  
220 to prevent introducing *P. dumerilii* into the environment. For cultures with very young juveniles,  
221 dirty water is removed using a vacuum filter (as with larval cultures above).

222

## 223 **Mature worm collection and maintenance**

224 Mature worms were collected and separated into females and males in large Sterilite boxes  
225 equipped with air bubblers. Mature worms for which the gender could not be identified (“unknown  
226 gender” worms) were placed with the males, as males are thought to not spawn in the presence of  
227 immature females. The boxes were monitored daily to remove dead worms, change the water if  
228 needed, and remove and use mature worms for setting up new cultures and for experiments.  
229 Mature worm collection was done systematically only during 2 weeks (on Mondays, Wednesdays,  
230 and Fridays) in a month when the worm maturation is expected to peak (starting about 10 days  
231 following the last day of “moon on”).

232

## 233 **Temperature Control and Monitoring**

234 Most labs use 18°C as the culturing temperature for *P. dumerilii* for the full life cycle.  
235 Previous studies on embryonic and larval development suggest that at least for these early stages  
236 the animals can be kept at lower or higher temperatures (14-30°C) [17], while a systematic testing  
237 of temperatures higher than 18°C for the full life cycle has not been reported. We have found that  
238 our cultures tolerated slightly higher average temperatures (19-20.5°C) (Suppl. Fig. 2). The  
239 thermostat of the culture room was set to 20°C. However, we kept an additional portable AC unit  
240 (*Arctic King*, WPPH08CR8N) set to about 18°C (65°F) running next to the cultures, which served  
241 as a back-up. We also used a large 18°C incubator (no light cycles) for keeping some worm cultures  
242 as reserves, in case the room temperature control severely failed.

243 To monitor temperature, a Monnit wireless temperature monitor (*Monnit*, MNS-9-IN-TS-  
244 ST) was placed on one of the shelves. In addition, we also used a thermometer (*Suplong*,  
245 COMINHKPR144821) which stores the minimum and maximum temperatures recorded within  
246 the shelving unit for manually checking the temperature fluctuations. The data collected by the  
247 Monnit thermometer was stored online and provided a complete list of all temperature readings.  
248 This system also sends alerts if it detects temperatures outside of a specified range.

249

## 250 **Light Spectra Measurements**

251 For the sun (*Nicrew*, ZJL-40A) and moon (Ebay seller: *21ledusa*, 700381560185) light  
252 sources, the irradiance per wavelength was measured using a spectrometer (*International Light*  
253 *Technologies*, ILT-ILT950-UV-NIR). To achieve different light intensities, an LED dimmer  
254 (DC12V~24V, *Supernight*) was used. The spectrometer was set up at 20 cm distance to the light  
255 source in an otherwise dark room. For plotting the data, the sensor output (in  $\mu\text{W}/\text{cm}^2$ ) was  
256 converted to the more commonly used photon flux (photons/( $\text{m}^2 \cdot \text{s}$ )).

257

258

## 259 **RESULTS AND DISCUSSION**

260

### 261 **Building the scalable shelving unit**

262

263 The first consideration for a lab to begin culturing *P. dumerilii* is the availability of  
264 appropriate housing infrastructure. In nature, synchronized reproduction occurs in phase with the  
265 lunar cycle. To mimic this, *P. dumerilii* is typically maintained in a defined light regime, consisting  
266 of 16 : 8 hours of daylight : night, with dim nocturnal lighting simulating a full moon stimulus for  
267 several nights within a month (see below). Most labs currently working with *P. dumerilii* keep  
268 their worms in a separate culture room and control the room lights to achieve day, night, and moon

269 conditions. But having a dedicated worm culture room may not always be feasible or even needed  
270 if only a small scale of *P. dumerilii* culturing is desired. Additionally, *P. dumerilii* maturation  
271 peaks for only two weeks out of the month due to the lunar maturation cycle. Labs wanting to  
272 have mature worms continuously would need separate culture spaces on opposite lighting  
273 schedules.

274  
275 To circumvent the need for separate culture rooms, and to use the space available for  
276 multiple purposes, we designed a stand-alone culture setup (Fig. 1) (Suppl. File 1 for a  
277 comprehensive list of all the parts, reagents, and ordering information). The setup is composed of  
278 a shelving unit (*Nexel*, 188127) with wheels (*Nexel*, CA5SB) for ease of access, black-out curtains  
279 to prevent unwanted light reaching the worms during the night hours when complete darkness is  
280 needed (i.e. no “moon”), and two sets of lights (sun and moon) on separate circuits installed on  
281 each shelf controlled by a timer (Fig. 1C, Suppl. File 2). With this setup, labs wanting to have  
282 mature worms available during the entire month could have two or more culture units on opposite  
283 moonlight schedules in the same room.

284  
285 The shelving unit (Fig. 1A, B) was assembled according to the manufacturer’s directions.  
286 The unit comes with 4 shelves. We added 3 more shelves (*Nexel*, S2448SP), each being  
287 approximately 8 inches (20.3 cm) apart from each other. This allowed enough space for the lights  
288 and stacking up 2 rows of culture boxes. Small (low worm density) boxes can fit into two rows on  
289 each shelf of our culturing unit. They can also be stacked, thus in theory 28 small Sterilite boxes  
290 (14 if unstacked) can be stored per shelf.

291  
292 After assembling the shelving unit, the sun (*NICREW*, B06XYKD67V) (Fig. 1D) and moon  
293 (Ebay seller: *21ledusa*, 700381560185) (Fig. 1E) lights were installed on each shelf by punching  
294 holes on the plastic and using aluminum welding rods to secure the lights (Figs. 2E-E’, 3B). See  
295 Figures 2 and 3 for circuit diagrams and blueprints for the assembly of lights. Dimmers (*HitLights*,  
296 B00RBXPDQU) were included in the circuits to control the brightness from each set of lights (Fig.  
297 1F, 2B).

298  
299 Next, 4 pieces of blackout curtains (*Deconovo*, B01MU1CMSD, 42x63 inches) were  
300 modified by sewing hook and loop (e.g. Velcro) strips on the curtains along the edges (Fig. 4). We  
301 found that using 4 pieces of fabric provided flexibility of access to cultures from all sides of the  
302 shelving unit, as well as ease of running cables from the lights and air pumps to the power box  
303 (Fig. 4B). A basic sewing machine (Singer Simple 3232) and needles made for thick fabric were  
304 used for sewing the hook and loop strips onto the curtains.

305  
306 After the blackout curtains were installed, the power box (*Allied Moulded Products Inc.*  
307 AM2068RT) was attached to one of the shorter sides of the shelving (either left or right side would  
308 be fine, depending on which side is more comfortable for a given space). The power supply box  
309 was attached to the shelves using two plastic struts (on the left and the right of the back panel)  
310 sandwiched between the box and shelves; the struts were helpful to support the screws securing  
311 the box onto the shelf. Next, power strips and the timer were installed into the power box (Fig.  
312 1C). The sun and moon lights were connected to the timer in separate circuits with the aid of an  
313 electrician.

314

## 315 **Light/Dark Cycles**

316 *P. dumerilii* mature according to a lunar cycle. In their natural habitat, worms will  
317 congregate at the surface of the water within about ten days following the full moon for a period  
318 of about 2 weeks to spawn [25,28]. In the lab, a synchronized swarming pattern can be obtained  
319 by simulating 28-day lunar cycle lighting conditions [16]. This is achieved by having a period of  
320 8 nights where a dim light turns on at night in order to mimic the moon. This period is followed  
321 by 20 days in which the worms are kept in complete darkness during the night hours. Note that the  
322 “moon” lights do not mimic the phases of the moon; worms respond to simple presence/absence  
323 of light at night. Setting the lunar lighting to a schedule of four exact weeks simplifies planning in  
324 terms of knowing when the worms will peak in maturation. We followed these standards  
325 established by others before in our culture conditions: For all days, worm cultures in the shelving  
326 unit received 16 hours of daylight and 8 hours of night (either with the moonlight on or off) (Fig.  
327 5A). These on and off cycles were controlled automatically by an industrial timer (*MRO Supply*,  
328 DG280A), and settings were adjusted according to manufacturer’s user guide (Suppl. File 2 for  
329 timer settings). The timer removed the need for manually installing and uninstalling the moon  
330 lights.

331  
332 To monitor that light conditions were properly set and maintained during the day and night,  
333 we used a Monnit wireless light monitor (*Monnit*, MNS-9-W2-LS-LM). The monitor sends the  
334 data to a wireless receiver installed at our facility, and users can access the sensor reads online via  
335 a simple user interface (<https://www.imonnit.com/>). The light monitor was periodically moved  
336 between shelves to ensure that the light signal reaching the worms was the same throughout the  
337 unit and that all the sun and moon lights were functioning properly. We then continued to regularly  
338 monitor each shelf lighting this way for any lights that may need replacement.

339  
340 Using the light monitor, we collected several types of light intensity data. To measure the  
341 amount of light each shelf received, we rotated the light sensor between shelves recording light  
342 levels for 24 hours each rotation (Fig. 5B-C). This was done for a period of two months so that  
343 we could have several readings from each shelf during “moon on” and “moon off” periods. For  
344 the first month, the sensor was placed on top of a Sterilite box. For the following month, the  
345 monitor was placed inside an unused small Sterilite box to get a more accurate estimate of the  
346 amount of light the worms received through the translucent lids. Of the measurements taken from  
347 inside a Sterilite box, the daylight range was between 221-1058 lux (see below for detailed photon  
348 flux information). Even though we did not systematically test whether the lowest or highest  
349 settings of illumination had different effects, we obtained mature worms from all shelves. Thus we  
350 conclude that values within this range will be sufficient for the worms to grow and mature.

351  
352 The moonlight range measured from inside a Sterilite box was 5-13 lux during a “moon  
353 on” period and 3-4 lux during a “moon off” period (Fig. 5B). To determine whether the reading  
354 of 3-4 lux during a moon-off period was due to sensor error or an outside light which infiltrated  
355 the unit’s curtains, we placed the sensor in a completely sealed and opaque box, and the sensor  
356 still read 3-4 lux. Therefore, we assume that when the sensor read 3-4 lux, there was no or  
357 negligible light within the culture setup. Taking these values as “zero” for this particular sensor,  
358 we adjusted the moonlight brightness to a higher range of brightness using the dimmers aiming for  
359 10-15 lux (Fig. 5C), taking previously-published values into account [16].

360



### 361 **Light spectra distribution of the moon and sun lights**

362 The distribution and strength (irradiance) of the wavelength available to organisms can affect many  
363 biological processes such as circadian rhythm, sexual maturation etc [29,30]. We next determined  
364 the spectral distribution of the moon and sun lights in our culture setup by using a photo  
365 spectrometer. We tested the spectral properties of both light sources at different light intensities  
366 and measured the energy flux for each wavelength. We found that the moon lamp consistently  
367 emitted light around 450 nm wavelength at different intensity settings (one example shown in Fig.  
368 6A). We also found that the sun lamp emission spectrum did not change with at two different levels  
369 of illuminance tested: 200 lux (Fig. 6C) and 1000 lux (Fig. 6D). Overall, these results indicate that  
370 these light sources can be used at any intensity needed for a given experiment without causing a  
371 change in the emission spectrum.

372

### 373 **Developing a standardized feeding method for juvenile *Platynereis dumerilii***

374 To date, most labs that culture *P. dumerilii* have fed them frozen spinach (organic), tetraselmis  
375 fish flakes (*Tetra*, 7101), and live phytoplankton [27]. We found traditional methods to be  
376 ambiguous in terms of how much spinach the worms were actually receiving (e.g. “5 gr frozen  
377 spinach” could contain variable amounts of actual spinach, depending on the frozen water content  
378 of the product). Also studying growth and other physiological processes require standardized  
379 feeding conditions that can be replicated across different labs.

380

381 We therefore set out to develop an easy-to-replicate method of feeding (Fig. 7): in essence, cultures  
382 were given powdered spirulina (1.0 g/L) (*Micro Ingredients*) and Sera micron flakes (0.3 g/L)  
383 (*Sera*, 0072041678) suspended in 0.22  $\mu\text{m}$  NFSW (also see Suppl. File 1 for recipes and volumes  
384 of food used per box size). This way the worms received a homogenous mixture of food, the  
385 volume of which could be easily adjusted if fouling was observed or if food was consumed too  
386 quickly (Suppl. Fig. 3). Small, low density boxes (30 worms) were fed with 20 mL of this mixture  
387 and the larger, high density boxes (>100 worms) received 40 mL. Worms were fed twice per week,  
388 on Tuesdays and Fridays (note that labs using the spinach-tetramin regimen typically feed their  
389 cultures on a Monday-Wednesday-Friday schedule).

390

### 391 **Comparison of spinach and spirulina feeding regimens in juveniles**

392 To compare the new spirulina-sera micron cocktail feeding method to the traditional  
393 spinach-fish flakes-algae feeding regimen, we tested the growth rate difference between groups of  
394 juvenile worms that were on either of these diets. For simplicity we refer to these as spinach versus  
395 spirulina feeding regimens, even though the spinach regimen also includes fish flakes and algae,  
396 and the spirulina regimen includes sera micron. This experiment was carried out at Florian Raible’s  
397 laboratory at MFPL (Vienna), where the primary feeding regimen is the spinach regimen.

398

399 For the experiment, 80 sibling juveniles (strain PIN619512 R-mix) that were 53 days old  
400 were split into eight culture boxes (500 mL, 1:1 AFSW:NFSW). Half of the boxes were fed with  
401 spinach regimen, and the other half with spirulina regimen. The spinach-fed animals received 0.5  
402 grams of organic spinach leaves every Tuesday, and 10 mL of algae cocktail (containing 0.25 g/L  
403 finely ground Tetramin flakes in lab-cultured *Tetraselmis marina* algae solution) every Friday.  
404 These values are based on estimated averages used by the Raible Lab, since a quantifiable feeding  
405 regimen has not been established. The spirulina-fed animals received 10 mL of spirulina cocktail  
406 every Tuesday and Friday (same spirulina regimen recipe as reported above and in Fig. 7).

407  
408 At the time of setting up the experiment (t=0) worms were anesthetized in 1:1 NSFW and  
409 7.5% Magnesium Chloride (MgCl<sub>2</sub>) [12] and the number of segments were counted for each  
410 individual (average number of 19.2 segments per animal, Fig. 8). After this, the number of  
411 segments in all individuals were counted once every two weeks over the course of six weeks. We  
412 found that the animals that were on the spinach regimen grew new segments at a notably faster  
413 rate (6 segments per week) than animals that were on the spirulina regimen (3.6 segments per  
414 week) (Fig.8).

415  
416 It is worth noting that the spinach-fed animals did not finish eating all the spinach provided  
417 each week and were therefore fed *ad libitum*, as opposed to the spirulina-fed animals that seemed  
418 to consume the algae provided in a relatively short time. This was observed by checking the color  
419 of the water (as in Suppl. Fig. 3A), which turned green upon feeding and cleared up again in the  
420 first 1-2 days after feeding. This indicates that the amount of food provided to these animals was  
421 not sufficient to grant optimal growth, which may explain the slower growth rate. In a future  
422 experiment varying amounts of spirulina cocktail will be tested and compared to the spinach  
423 regimen. In the culture boxes at the MBL (Woods Hole), we have extensive algal growth over the  
424 course of only a few weeks with no adverse effects (see Fig. 1G as an example). We suspect this  
425 algal film may act as an extra source of food for juvenile worms in addition to the spirulina  
426 cocktail, while during the above experiment (performed in Vienna cultures) the culture boxes did  
427 not develop such dense algal growth, which may have also affected the rate of growth. Overall,  
428 we find that the standardized spirulina-sera micron feeding regimen provides an easily-scalable  
429 and more accurately measured feeding method, which eventually yields health mature worms (see  
430 below).

### 431 **Feeding the young larvae with spirulina**

432 After establishing that a defined spirulina diet can be used to maintain a culture of juvenile  
433 to mature worms, we next wondered whether a similar strategy could already be applied at earlier  
434 stages. Throughout early development, *P. dumerilii* larvae depend on yolk and four large lipid  
435 droplets, one contained in each macromere as their initial source of food [17]. These droplets are  
436 largely expended by the 3-segmented juvenile stage (around 5-7 dpf), and the developing worms  
437 must seek other energy sources in order to survive. Typically, in lab cultures feeding the larvae  
438 with live algae starts around 7-10 dpf. To our knowledge, several different algae species have  
439 been used successfully by different labs. Among these are *Tetraselmis marina*, *Tetraselmis sp.*  
440 (SAG no 3.98 from Department Experimental Phycology and Culture Collection of Algae  
441 (EPSAG)), *Isochrysis galbana* (also called *T-iso*), and *Tetraselmis chuii*. Ernest E. Just procured  
442 algae for his larval *P. dumerilii* cultures by scraping the bottoms of mariculture water tables for a  
443 “felt-like growth of diatoms and protozoa” [23].  
444

445  
446 Despite being a good nutritional source, live algae cultures are prone to contamination by  
447 protozoa or rotifers, and some of these organisms can end up over-populating *P. dumerilii* larvae  
448 cultures, causing poor culturing quality. In addition, keeping live algae cultures is time-consuming.  
449 We therefore tested if a spirulina-only cocktail (powdered spirulina in NSFW, 1.0 g/L) would  
450 provide an adequate substitute for the established algae cultures for feeding larvae.

451 Larvae from a single batch were split by volume into 3 groups around 24 hpf. At 7 dpf,  
452 they were transferred to culture boxes with 250 mL NSFW. Each group was fed with either: i) 10

453 mL spirulina-only ii) 25 mL spirulina-only iii) algae-only (10 mL live algae per box), 3 times per  
454 week (Mo, Wed, Fri). At 24 days, the animals were checked under the microscope for growth and  
455 development. Larvae in both spirulina-only boxes appeared healthy and, compared to the group  
456 fed with algae only, the spirulina-fed larvae appeared larger. The algae-fed culture box appeared  
457 very clean at this time, suggesting the amount of algae used may not have been enough (completely  
458 consumed). These cultures were not followed for the long-term effects of the feeding regime on  
459 maturation. However, the observation suggests it may be possible to grow larvae without requiring  
460 live algae cultures, while further and long-term testing of the spirulina-only regimen is still needed.

461

### 462 **Worm maturation under new culturing conditions**

463 To ensure the proper functioning of our setup, we recorded the number of males, females,  
464 and worms of unknown gender over a seven-month period (Fig. 9). We did not explicitly look for  
465 mature animals outside of the scheduled maturation window. However, off-cycle maturations  
466 were recorded if we noticed mature animals while performing other husbandry tasks. Each cycle  
467 yielded an average of 53 mature worms (Fig. 9D), though the number of mature animals we found  
468 varied according to the number of worms which were in low density cultures (Suppl. Fig. 4). Our  
469 cultures began producing mature animals approximately five months after we received our initial  
470 *P. dumerilii* larvae (however, this corresponds to four months after light cycles started). The initial  
471 cultures were not introduced to the lighting regimen until approximately one-month post-  
472 fertilization (December 29, 2017) when the first low density boxes were made and transferred onto  
473 the shelving unit. It should therefore be noted that, typically, it is possible for mature animals to  
474 be procured more quickly (3-4 months post fertilization). At this time we had approximately 840  
475 worms in low density cultures and found 22 mature worms. As we increased the number of low-  
476 density boxes in the shelving unit, the number of mature worms we found in the following months  
477 increased as expected. Three months after finding the first mature worms, we expanded our low-  
478 density cultures to house approximately 2000 worms, and around 60 mature worms were found  
479 (Fig. 9D, Suppl. Fig. 4).

480

481 Our cultures tended to produce a slightly greater number of mature males (average of 24/cycle)  
482 than females (average of 18/cycle) (Fig. 9E, F). We are uncertain if this is a product of our  
483 culturing conditions or if this mimics a more natural sex ratio for this species. Just observed the  
484 opposite in his laboratory cultures of *P. megalops*, where females outnumbered males, meanwhile  
485 he noted that in nature the reverse was the case (males outnumbered females) [23,28]. In addition,  
486 the peak maturation in our Woods Hole cultures starting at day 10 after the moon light is off differs  
487 slightly from what has been observed in some *P. dumerilii* strains in Vienna [16] and from the  
488 earliest reports from Ranzi on the Naples population [31,32]. This could be due to the method of  
489 scoring worms as mature: for example, here we used color change after metamorphosis and scored  
490 these worms as mature, while another method of scoring is by counting only the worms that have  
491 spawned as mature. Other possible reasons for the difference could be the light conditions  
492 (availability or lack of particular wavelengths), or genetics.

493

### 494 **Normal development under the reported culturing conditions**

495 Under the culturing conditions we have reported here, we have been able to raise *P. dumerilii*  
496 for several generations at the MBL, and obtained normally-developing embryos, larvae and  
497 juveniles (Fig. 10). We have also injected fertilized eggs with mRNA and successfully reproduced  
498 the results obtained with past *P. dumerilii* cultures [5] (Fig. 10F, F'). Different from other labs

499 working with *P. dumerilii*, we have observed jelly production by fertilized oocytes to be longer  
500 (until around 1,5 hpf compared with the cultures in Paris and Vienna which typically release jelly  
501 until around 1 hpf). We suspect the slightly lower salinity levels of the sea water in Woods Hole,  
502 or some undetermined factors in the sea water may be the cause of the jelly production to last  
503 longer than usual in our cultures. We have also observed juvenile worms to regenerate successfully  
504 at a similar rate to the published stages of regeneration for *P. dumerilii* (results not shown) [6].  
505

## 506 507 **Future directions**

508 Future improvements to culturing *Platynereis* and other aquatic organisms remain.  
509 Integrating temperature control to the shelving setup itself (for example, by using a cooling device  
510 on each shelf) instead of controlling the temperature of the culture room will allow greater  
511 flexibility and reliability. Determining why natural sea water is needed for culturing *Platynereis*  
512 embryos and larvae, and identifying the organic and inorganic factors that make the natural sea  
513 water critical for optimal culturing outcomes may allow developing a working artificial seawater  
514 recipe and switching to artificial sea water entirely. Finally, determining whether there are more  
515 specific light spectral needs to improve *Platynereis* maturation rates will be helpful to have faster  
516 maturation times.  
517

518 The benefits of the system we developed are not only scalability, but also the possibility to  
519 control food input more accurately, and the possibility to vary environmental parameters more  
520 flexibly. These are crucial components of culturing especially, as the living systems and their  
521 biology is directly affected by nutrition, and often by light cycles. Being able to control these  
522 parameters and standardize them will lead to easier reproducibility of experiments and techniques  
523 by different labs. We also envision that this culture setup design, detailed blueprints, and  
524 standardized feeding methods presented here will be beneficial to not only the community of labs  
525 that use *P. dumerilii* as a research organism, but also those labs that are interested in having *P.*  
526 *dumerilii* at a small scale for specific experiments and/or educational purposes, as well as for labs  
527 studying other aquatic invertebrates.  
528

## 529 530 **Acknowledgements**

531 We thank John Carr, Kate Dever, Lindsey DeMelo and the rest of the MRC staff at the MBL for  
532 their help in building the shelving setup and culture husbandry; we thank Jon Henry, and  
533 colleagues working on *P. dumerilii* for their helpful suggestions; and Guillaume Balavoine for  
534 providing the *P. dumerilii* larvae to start our cultures.  
535

## 536 537 **Author Contributions**

538 BDO and JG designed the shelving setup; EK, AWS and BDO collected the data; EK, AWS, FR,  
539 and BDO analyzed the data; EK, AWS, and BDO drafted the manuscript; FR and BDO edited the  
540 manuscript. All authors read and approved the manuscript.  
541

## 542 543 **REFERENCES**

- 542 1. Wilson EB. The cell-lineage of Nereis. A contribution to the cytogeny of the annelid body. J  
543 Morphol. Wiley Subscription Services, Inc., A Wiley Company; 1892;6: 361–480.

- 544 2. Fischer A, Dorresteijn A. The polychaete *Platynereis dumerilii* (Annelida): a laboratory animal with  
545 spiral cleavage, lifelong segment proliferation and a mixed benthic/pelagic life cycle. *Bioessays*.  
546 2004;26: 314–325.
- 547 3. Williams EA, Jékely G. Towards a systems-level understanding of development in the marine  
548 annelid *Platynereis dumerilii*. *Curr Opin Genet Dev*. 2016;39: 175–181.
- 549 4. Balavoine G. Segment formation in Annelids: patterns, processes and evolution. *Int J Dev Biol*.  
550 2014;58: 469–483.
- 551 5. Özpolat BD, Handberg-Thorsager M, Vervoort M, Balavoine G. Cell lineage and cell cycling  
552 analyses of the 4d micromere using live imaging in the marine annelid *Platynereis dumerilii*. *Elife*.  
553 2017;6. doi:10.7554/eLife.30463
- 554 6. Planques A, Malem J, Parapar J, Vervoort M, Gazave E. Morphological, cellular and molecular  
555 characterization of posterior regeneration in the marine annelid *Platynereis dumerilii*. *Dev Biol*.  
556 2018; doi:10.1016/j.ydbio.2018.11.004
- 557 7. Gazave E, Béhague J, Laplane L, Guillou A, Préau L, Demilly A, et al. Posterior elongation in the  
558 annelid *Platynereis dumerilii* involves stem cells molecularly related to primordial germ cells. *Dev*  
559 *Biol*. 2013;382: 246–267.
- 560 8. Ayers T, Tsukamoto H, Gühmann M, Veedin Rajan VB, Tessmar-Raible K. A Go-type opsin  
561 mediates the shadow reflex in the annelid *Platynereis dumerilii*. *BMC Biol*. 2018;16: 41.
- 562 9. Schenk S, Bannister SC, Sedlazeck FJ, Anrather D, Minh BQ, Bileck A, et al. Combined  
563 transcriptome and proteome profiling reveals specific molecular brain signatures for sex, maturation  
564 and circalunar clock phase. *Elife*. 2019;8. doi:10.7554/eLife.41556
- 565 10. Lauri A, Brunet T, Handberg-Thorsager M, Fischer a. HL, Simakov O, Steinmetz PRH, et al.  
566 Development of the annelid axochord: Insights into notochord evolution. *Science*. 2014;  
567 doi:10.1126/science.1253396
- 568 11. Brunet T, Fischer AHL, Steinmetz PRH, Lauri A, Bertucci P, Arendt D. The evolutionary origin of  
569 bilaterian smooth and striated myocytes. *Elife*. eLife Sciences Publications Limited; 2016;5: e19607.
- 570 12. Ackermann C, Dorresteijn A, Fischer A. Clonal domains in postlarval *Platynereis dumerilii*  
571 (Annelida: Polychaeta). *J Morphol*. 2005;266: 258–280.
- 572 13. Nakama AB, Chou H-C, Schneider SQ. The asymmetric cell division machinery in the spiral-  
573 cleaving egg and embryo of the marine annelid *Platynereis dumerilii*. *BMC Dev Biol*. 2017;17: 16.
- 574 14. Rebscher N, Lidke AK, Ackermann CF. Hidden in the crowd: primordial germ cells and somatic  
575 stem cells in the mesodermal posterior growth zone of the polychaete *Platynereis dumerilii* are two  
576 distinct cell populations. *Evodevo*. 2012;3: 9.
- 577 15. Vergara HM, Bertucci PY, Hantz P, Tosches MA, Achim K, Vopalensky P, et al. Whole-organism  
578 cellular gene-expression atlas reveals conserved cell types in the ventral nerve cord of *Platynereis*  
579 *dumerilii*. *Proc Natl Acad Sci U S A*. 2017;114: 5878–5885.
- 580 16. Zantke J, Ishikawa-Fujiwara T, Arboleda E, Lohs C, Schipany K, Hallay N, et al. Circadian and  
581 Circalunar Clock Interactions in a Marine Annelid. *Cell Rep*. The Authors; 2013;5: 99–113.

- 582 17. Fischer AH, Henrich T, Arendt D. The normal development of *Platynereis dumerilii* (Nereididae,  
583 Annelida). *Front Zool.* 2010;7: 31.
- 584 18. Backfisch B, Veedin Rajan VB, Fischer RM, Lohs C, Arboleda E, Tessmar-Raible K, et al. Stable  
585 transgenesis in the marine annelid *Platynereis dumerilii* sheds new light on photoreceptor evolution.  
586 *Proc Natl Acad Sci U S A.* 2013;110: 193–198.
- 587 19. Zantke J, Bannister S, Rajan VB, Raible F, Tessmar-Raible K. Genetic and genomic tools for the  
588 marine annelid *Platynereis dumerilii*. *Genetics.* 2014;197: 19–31.
- 589 20. Veedin-Rajan VB, Fischer RM, Raible F, Tessmar-Raible K. Conditional and specific cell ablation  
590 in the marine annelid *Platynereis dumerilii*. *PLoS One.* 2013;8: e75811.
- 591 21. Bannister S, Antonova O, Polo A, Lohs C, Hallay N, Valinciute A, et al. TALENs mediate efficient  
592 and heritable mutation of endogenous genes in the marine annelid *Platynereis dumerilii*. *Genetics.*  
593 2014;197: 77–89.
- 594 22. Achim K, Eling N, Vergara HM, Bertucci PY, Brunet T, Collier P, et al. Whole-body single-cell  
595 sequencing of the *Platynereis* larva reveals a subdivision into apical versus non-apical tissues  
596 [Internet]. *bioRxiv.* 2017. p. 167742. doi:10.1101/167742
- 597 23. Just EE. On Rearing Sexually Mature *Platynereis megalops* from Eggs. *Am Nat.* [University of  
598 Chicago Press, American Society of Naturalists]; 1922;56: 471–478.
- 599 24. Just EE. The Relation of the First Cleavage Plane to the Entrance Point of the Sperm. *Biol Bull.*  
600 *Marine Biological Laboratory;* 1912;22: 239–252.
- 601 25. Hempelmann F. Zur Naturgeschichte von *Nereis dumerilii*. *Aud et Edw Zoologica.* 1911;25: 1–135.
- 602 26. Fischer A, Dorresteijn A. Culturing *Platynereis dumerilii* [Internet]. Available: [http://www.staff.uni-](http://www.staff.uni-giessen.de/~gfl307/breeding.htm)  
603 [giessen.de/~gfl307/breeding.htm](http://www.staff.uni-giessen.de/~gfl307/breeding.htm)
- 604 27. García-Alonso J, Smith BD, Rainbow PS. A compacted culture system for a marine model  
605 polychaete (*Platynereis dumerilii*). *Pan-American Journal of Aquatic Sciences.* 2013;8: 142–146.
- 606 28. Just EE. Breeding Habits of the Heteronereis Form of *Platynereis megalops* at Woods Hole, Mass.  
607 *Biol Bull. Marine Biological Laboratory;* 1914;27: 201–212.
- 608 29. Raible F, Takekata H, Tessmar-Raible K. An Overview of Monthly Rhythms and Clocks. *Front*  
609 *Neurol. Frontiers Media SA;* 2017;8: 189.
- 610 30. Cho E, Oh JH, Lee E, Do YR, Kim EY. Cycles of circadian illuminance are sufficient to entrain and  
611 maintain circadian locomotor rhythms in *Drosophila*. *Sci Rep.* 2016;6: 37784.
- 612 31. Ranzi S. Ricerche sulla biologia sessuale degli Anellidi. *Pubbl Staz Zool Napoli.* 1931;11: 271–292.
- 613 32. Ranzi S. Maturita sessuale degli Anellidi e fasi lunari. *Boll Soc Ital Biol Sper.* 1931;6: 18.

614  
615  
616  
617

618 **FIGURES and FIGURE LEGENDS**

619

620 **Figure 1 – Scalable culture setup for *Platynereis dumerilii*.** A) The shelving unit is enclosed  
621 in a blackout curtain which keeps unwanted light out during “moon off” periods of *P. dumerilii*’s  
622 lunar maturation cycle. Putting the unit on wheels (arrowhead) allows us to easily access culture  
623 boxes at the back of the shelves. The curtain can also be opened from both sides. B) Each shelf  
624 within the unit is equipped with identical lighting to ensure all culture boxes are receiving both  
625 sun and moonlight. C) The lighting is controlled automatically. Controls are located in a box  
626 outside of the unit. D) Sun lighting on. E) Moon lighting on. F) The intensity of moonlight can  
627 be easily adjusted with the dimmer shown here. A wireless light monitor was used to ensure  
628 each shelf received equal light intensity. G) Sterilite boxes made of polypropylene and  
629 polyethylene were used to house worms. After several months of culturing, algae was seen to  
630 grow in the boxes without harmful effects to the worms.

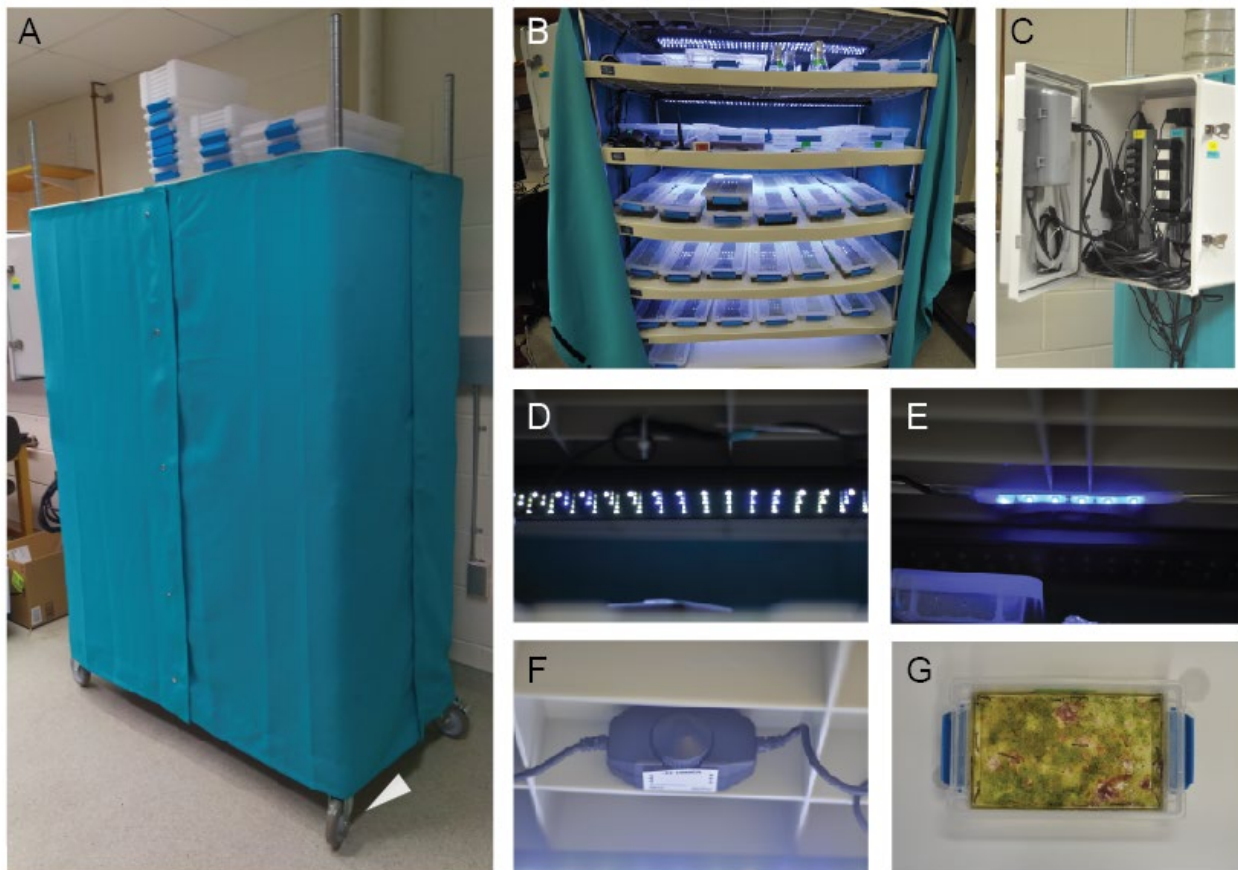

631

632

633

634

635

636

637

638

639

640 **Figure 2 – Setting up the moon light.** A) Diagram of moon light circuit. One moon light per  
641 shelf is installed, connected to a dimmer and an extension cord (for reaching to the power strip).  
642 The moon power adapters should be plugged into the power strip controlled by the timer channel  
643 dedicated to the moon lights. (Note that power adapters come with the LED strips and do not  
644 need to be purchased separately.) B) Photograph showing the dimmer and LED strip  
645 components, attached to the shelf. C) Components of the moon light LED strip. The LED strips  
646 are purchased and then modified for the shelving. Aluminum rod helps with attaching the light  
647 to the shelf. Clear heat shrink tube and silicone is for sealing the light for protection from water. D)  
648 Schematic showing the components of the moon LED light, and assembly instructions. E) Using  
649 a hole puncher, plastic shelving is modified for insertion of the aluminum rod. Arrowheads:  
650 holes F) Holes can also be used for securing cables with zip-ties.

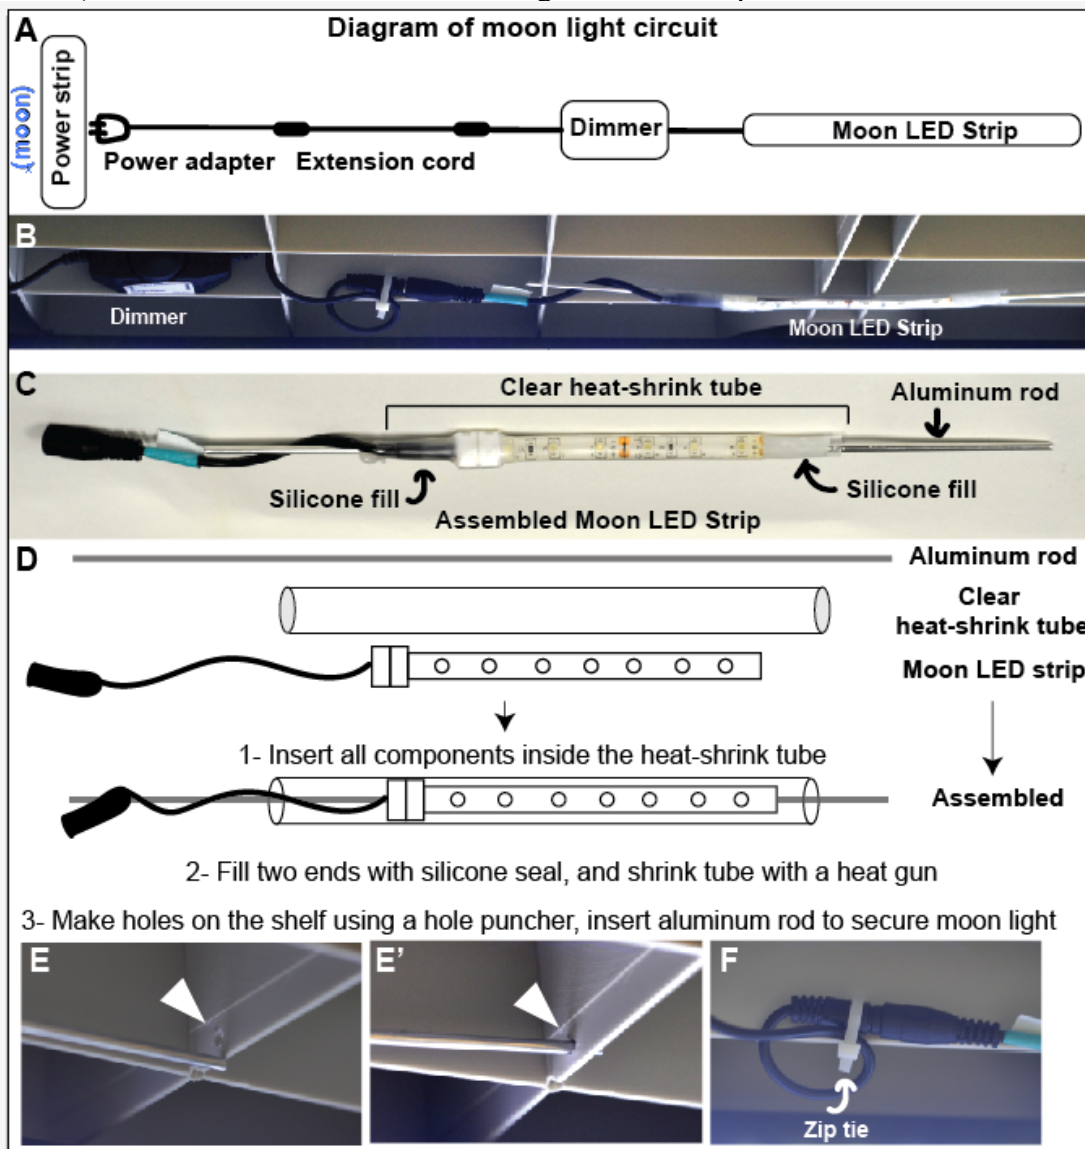

651  
652  
653  
654  
655



656 **Figure 3 – Setting up the sun light.** A) Diagram of the sun light circuit. One aquarium light per  
657 shelf is installed to provide light during the day. The aquarium light is connected to a dimmer  
658 and an extension cord (for reaching to the power strip). The power adapters should be plugged  
659 into the power strip controlled by the timer channel dedicated to the sun lights. In addition,  
660 aquarium light switch should always be ON, the turn ON-OFF will be controlled automatically  
661 by the timer. B) Bent aluminum rods (2 on each side) are used for securing the light onto the  
662 shelf. See Figure 2E-E' for aluminum rod insertion and hole punching.

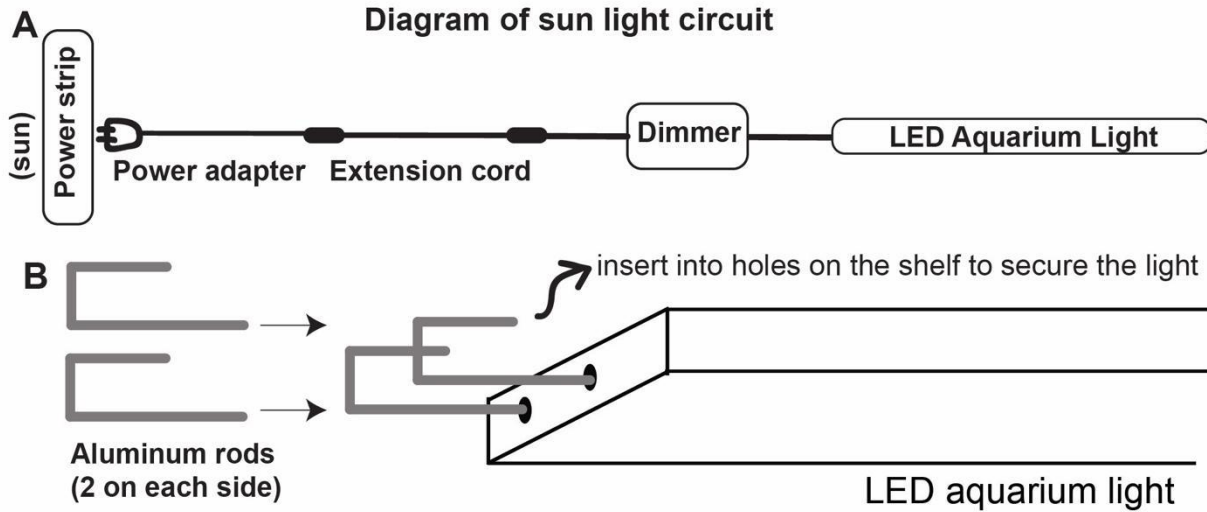

663  
664  
665  
666  
667  
668  
669  
670  
671  
672  
673  
674  
675  
676  
677  
678  
679  
680  
681  
682  
683  
684  
685  
686  
687

688 **Figure 4 – Blackout curtain construction and assembly.** A) Instructions for sewing Velcro  
689 (hook and loop) strips onto the blackout curtains. Top parts of the curtains will have one side of  
690 adhesive Velcro sewn on, and the other side applied onto the shelf. Even if adhesive type of  
691 Velcro is used, the adhesive alone is not sufficient to keep Velcro strips on fabric, and these  
692 strips need to be sewn. B) The side of shelving that will have the power box installed will have  
693 two Velcro strips to allow for extra sealing for cables from the shelf to run outside to the box. C-  
694 C') Schematic showing the assembly of 4 curtain pieces to cover the shelving unit (C) and a  
695 picture of the assembled shelf (C'). Note that the uppermost shelf is used for storing culture  
696 boxes, and does not function for culturing worms as it is not covered with curtains.

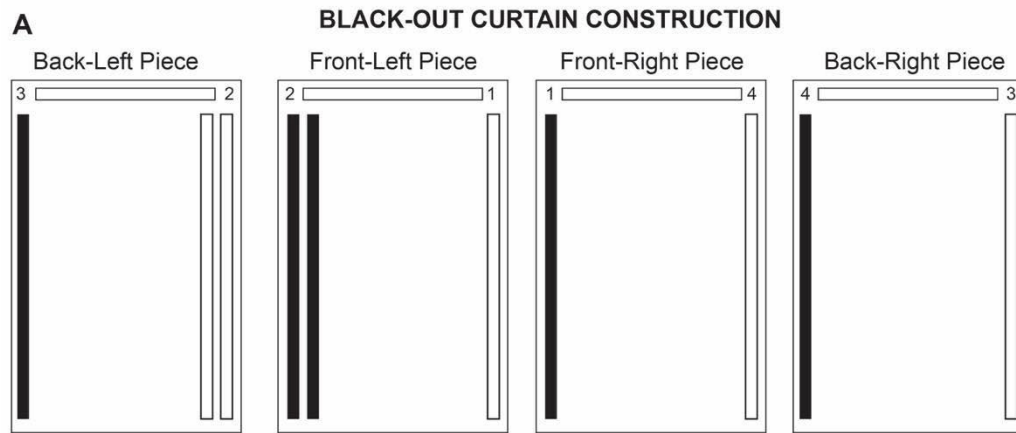

The side timer/power box will be attached needs two strips of velcro (see B)

#### NOTES

All vertical strips should be complementary hooks and loops

All horizontal strips will have the complementary side glued onto the shelf

— Velcro sewn on the front

□ Velcro sewn on the back

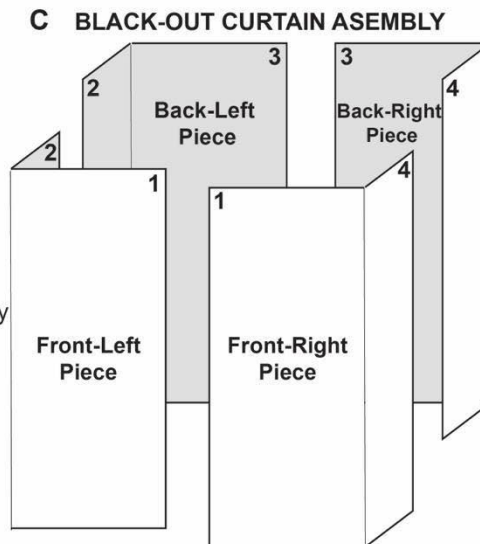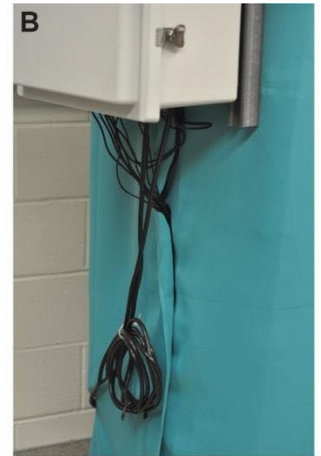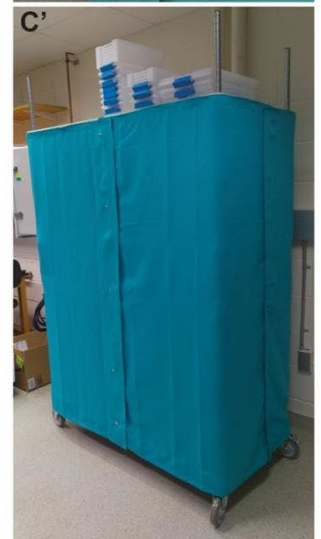

697  
698  
699  
700  
701  
702  
703  
704  
705  
706

707 **Figure 5 – Lighting Schedule** A) The schematic shows the lighting schedule we used to culture  
 708 *P. dumerilii* through maturity. Worms received 16 hours of sunlight every day and 8 hours of  
 709 either moonlight or complete darkness at night. In a 28 day cycle, the moon is on for 8 nights and  
 710 off for the remaining 20 days. *P. dumerilii*'s maturation period (indicated with the orange bar)  
 711 begins 10 days after the last night the moon was on and lasts for 2 weeks. B) Values of light  
 712 intensity (lux) were collected by a wireless light sensor. The sensor was placed inside a culture  
 713 box in order to record the amount of light the worms were receiving through the translucent  
 714 culture box lids. C) Example light sensor data recording over 4 days showing the transition  
 715 between a period when the moonlight was on and off.

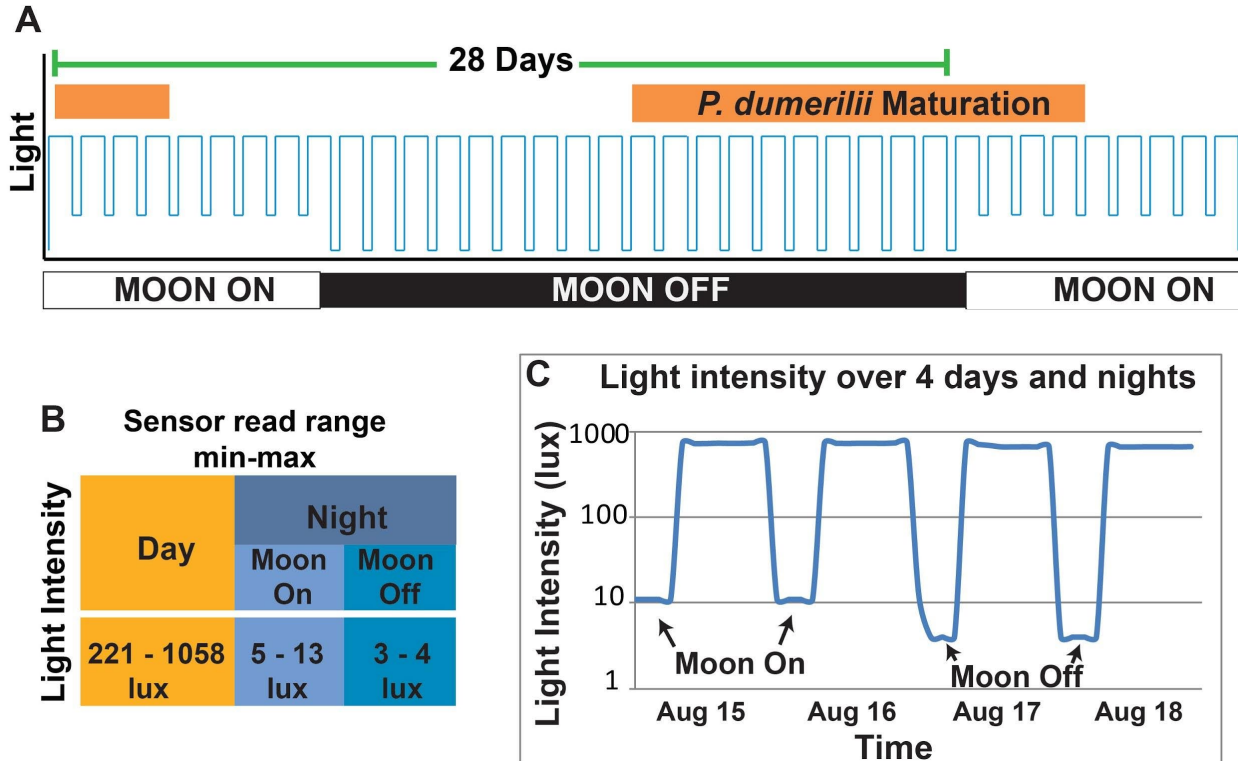

716  
 717  
 718  
 719  
 720  
 721  
 722  
 723  
 724  
 725  
 726  
 727  
 728  
 729  
 730  
 731

732 **Figure 6 – The distribution of irradiance per wavelength of the moon and sun LEDs.** A) An  
733 example of moon LED light irradiance per wavelength is shown. The emission was around 450  
734 nm at the different light intensities tested. B) Sun LED light spectral distribution did not change  
735 when the brightness of the lamp was changed between ~1000 lux (bright) and ~200 lux  
736 (dimmed). Graphs in (C) and (D) show the dimmed and bright setting distributions in (B)  
737 separately.

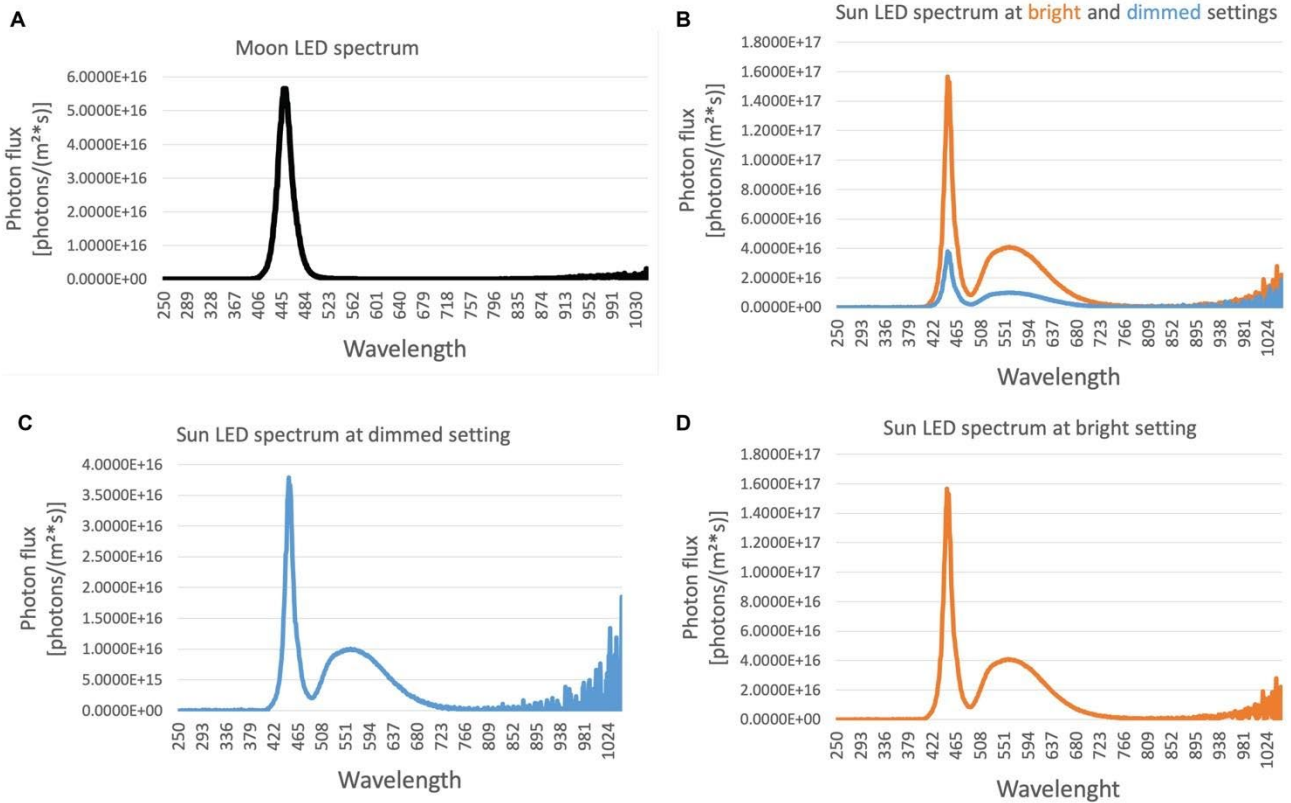

738  
739  
740  
741  
742  
743  
744  
745  
746  
747  
748  
749  
750  
751  
752  
753  
754

755 **Figure 7 – Standardized feeding methods** A) 1 g spirulina and 0.3g sera micron flakes were  
756 added to 1 L FSW and mixed thoroughly to create a homogenous solution. B-B') Spirulina  
757 powder obtained from Microingredients. C-C') Sera micron growth food.

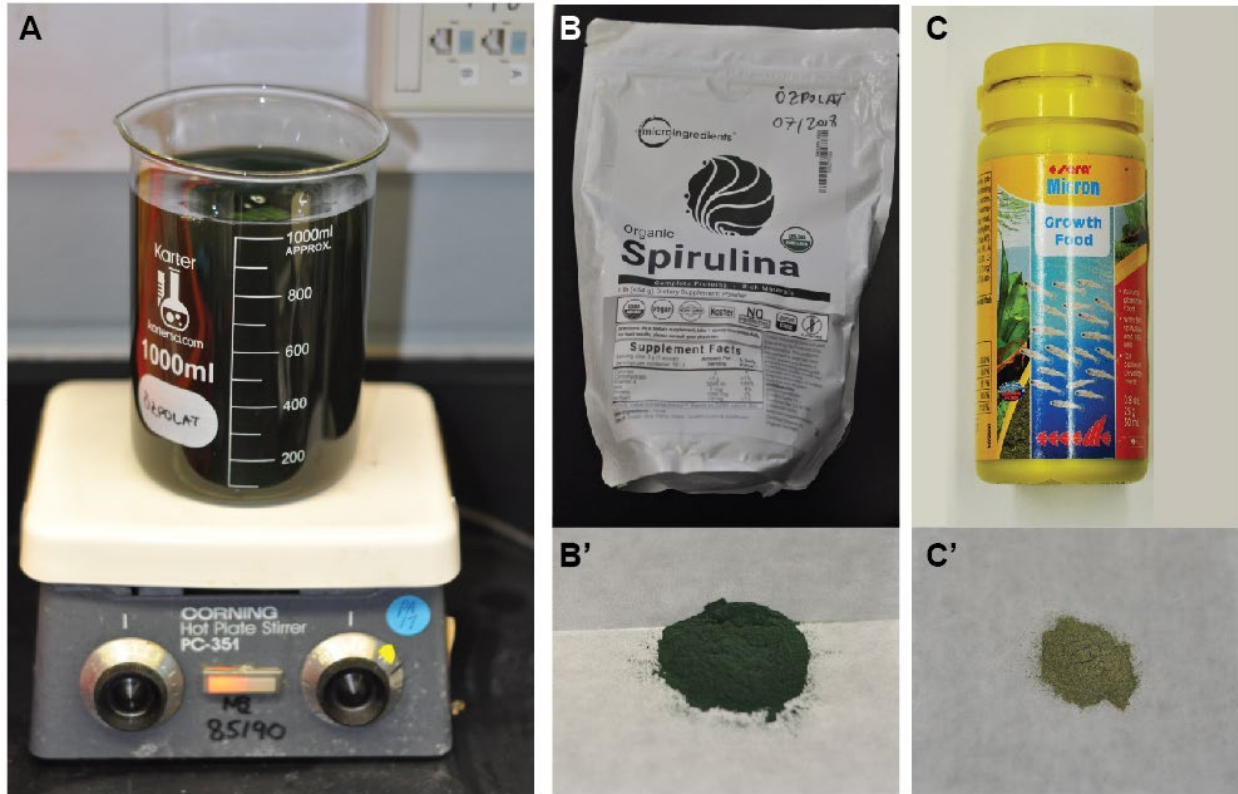

758  
759  
760  
761  
762  
763  
764  
765  
766  
767  
768  
769  
770  
771  
772  
773  
774  
775  
776  
777  
778  
779

780 **Figure 8 – Feeding regimen comparison.** Box-plot shows comparison of segment numbers in  
781 spirulina-fed and spinach-fed animals over the course of 6 weeks. To count the segments, each  
782 pair of parapodia was considered one segment, excluding the two pairs on the animal's heads.  
783 On the posterior end of the worms, only segments carrying parapodia with visible chaetae were  
784 counted. Due to natural inter-individual variation in size of the animals, the average number of  
785 segments per animal differed slightly already at t=0, with an average of 19,2 segments per  
786 animal (SD=2,9). Over the course of the experiment, the spinach-fed animals showed a notably  
787 faster growth rate, adding an average of 6 segments per week per animal, compared to an  
788 average of 3.6 segments per week per animal in the spirulina-fed condition. A statistically  
789 significant difference in segment numbers was observed after 4 weeks (t-test,  $p=3.5e^{-5}$ ) and 6  
790 weeks (t-test,  $p=2.3e^{-28}$ ) between animals that were under spinach vs spirulina regimens.

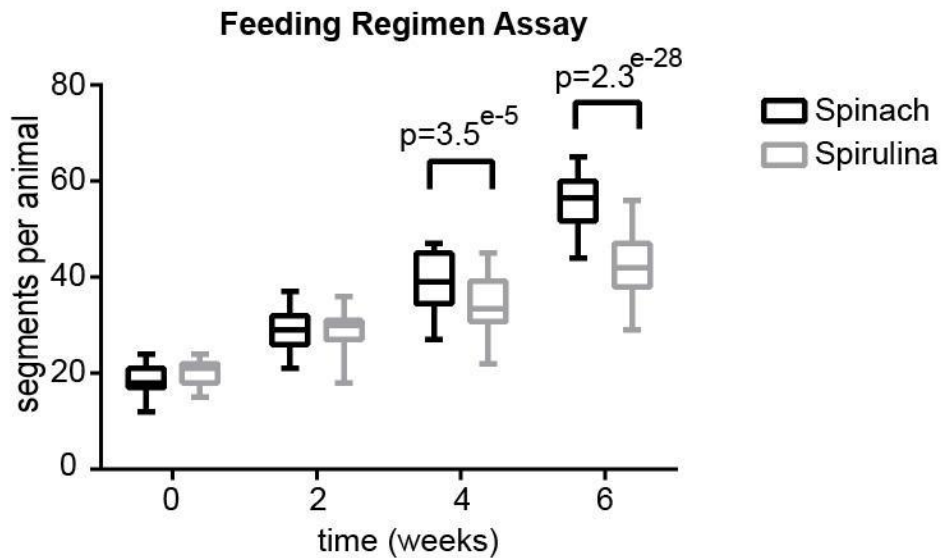

791  
792  
793  
794  
795  
796  
797  
798  
799  
800  
801  
802  
803  
804  
805  
806  
807  
808  
809

810 **Figure 9 – *P. dumerilii* Maturation** A) Mature male *P. dumerilii*. B) Mature female *P.*  
811 *dumerilii*. C) Mature *P. dumerilii* of unknown gender. D) Total number of mature *P. dumerilii*  
812 found for each given cycle. Culture boxes were checked 3 times per week during the maturation  
813 period. Black and white bars represent moon off and on cycles respectively (D-G). E) Number  
814 of female worms found during each cycle. F) Number of male worms found during each cycle.  
815 G) Number of worms of unknown gender found during each cycle. Note that cultures were  
816 systematically checked for mature worms only during the weeks maturation happens at a higher  
817 rate (for 2 weeks). We did not systematically check for mature worms outside of these 2 weeks.  
818 However, mature worms we came across outside of maturation weeks were noted as "off cycle"  
819 and are shown in the graphs. Bars on the X axis indicate Moon ON (white) and OFF (black)  
820 periods. Scale bars: 4 mm

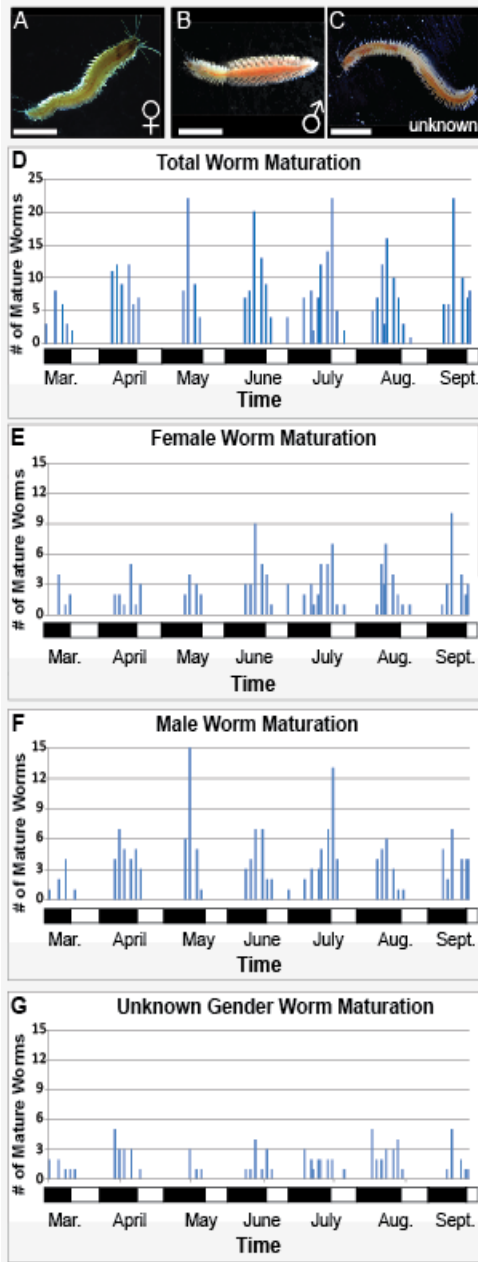

821

822 **Figure 10 – *P.dumerilii* development** A) *P. dumerilii* embryos at 2 hpf (hours post fertilization).  
823 Following fertilization, embryos secrete a protective jelly which appears as a hexagonal matrix.  
824 B) At 17 hpf *P. dumerilii* larvae reach the the prototroch stage. The larvae develop a band of cilia  
825 by 12 hpf which allows them to start swimming. C) *P. dumerilii* larva at 9 days post  
826 fertilization. D) Adults burrow in tubes made from a matrix of secreted mucus (Daly, 1973). E)  
827 *P. dumerilii* adults continue adding body segments throughout their lives from a posterior growth  
828 zone (arrowhead). F-F') Embryos injected with EGFP-caax and Histone-mCherry mRNA were  
829 imaged around 7 hpf using a confocal scope. Scale bars: 100  $\mu$ m (A-C), 5 mm (D,E), 50  $\mu$ m (F-  
830 F').

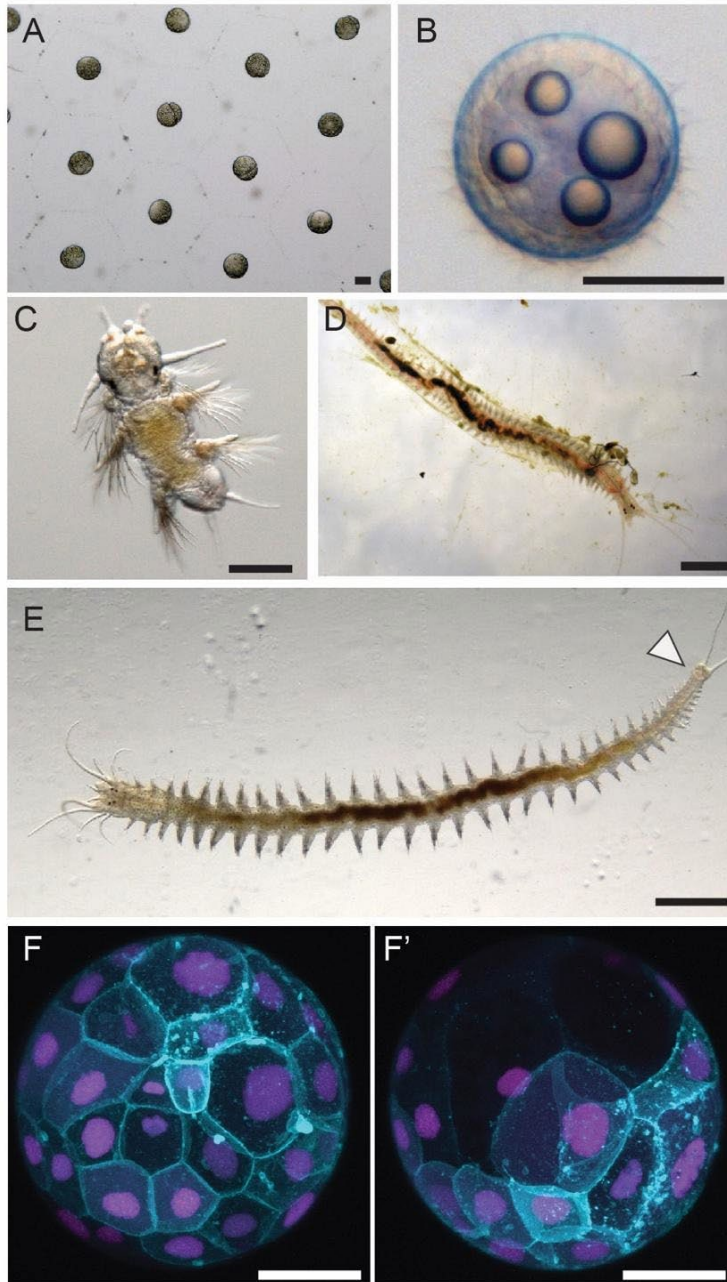

831  
832  
833



834 **SUPPLEMENTARY FIGURES AND LEGENDS**

835

836 **Supplementary Figure 1 – Water Filtration** A) Schematic of seawater filtering process and what each

837 level of filtration is used for. B) Our 0.22  $\mu\text{m}$  filtration set up. This system is more economical than

838 plastic filter bottles. See supplementary spreadsheet for catalog numbers and ordering information.

**A**

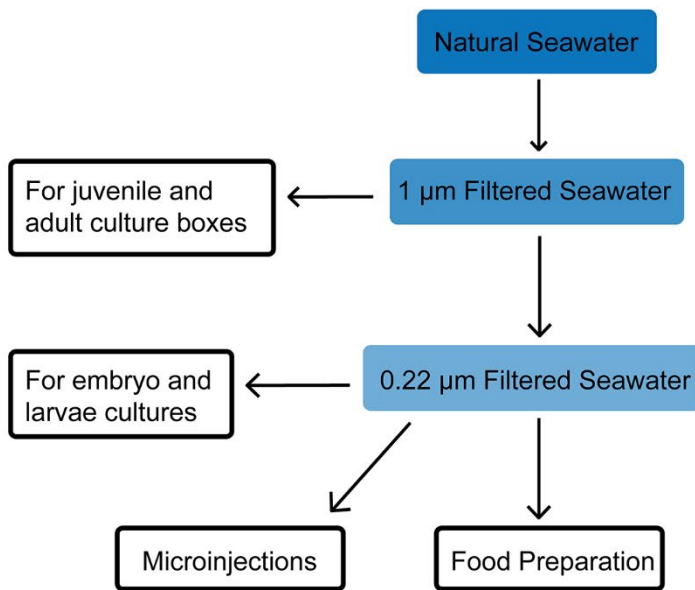

**B**

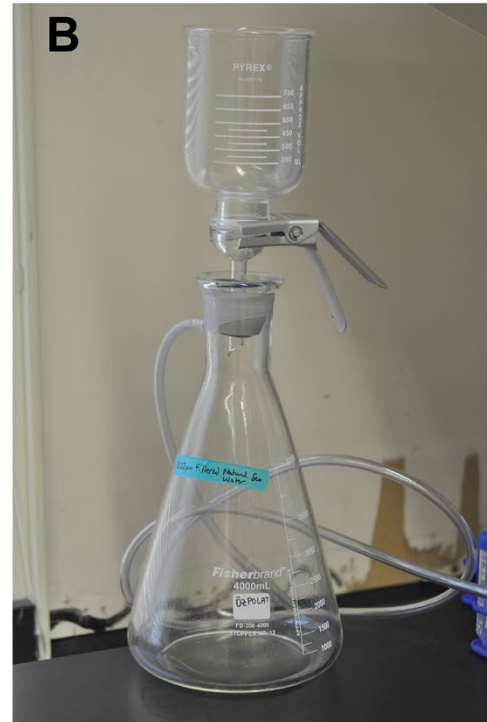

839

840

841

842

843

844

845

846

847

848

849

850

851 **Supplementary Figure 2 – Temperature** Cultures were kept at 20°C with some variability in  
852 the spring and summer months due to fluctuations in the temperature of the building. A portable  
853 air conditioning unit was used to help better regulate temperature during the summer months  
854 after the peaking of temperature above 22°C in April and May.

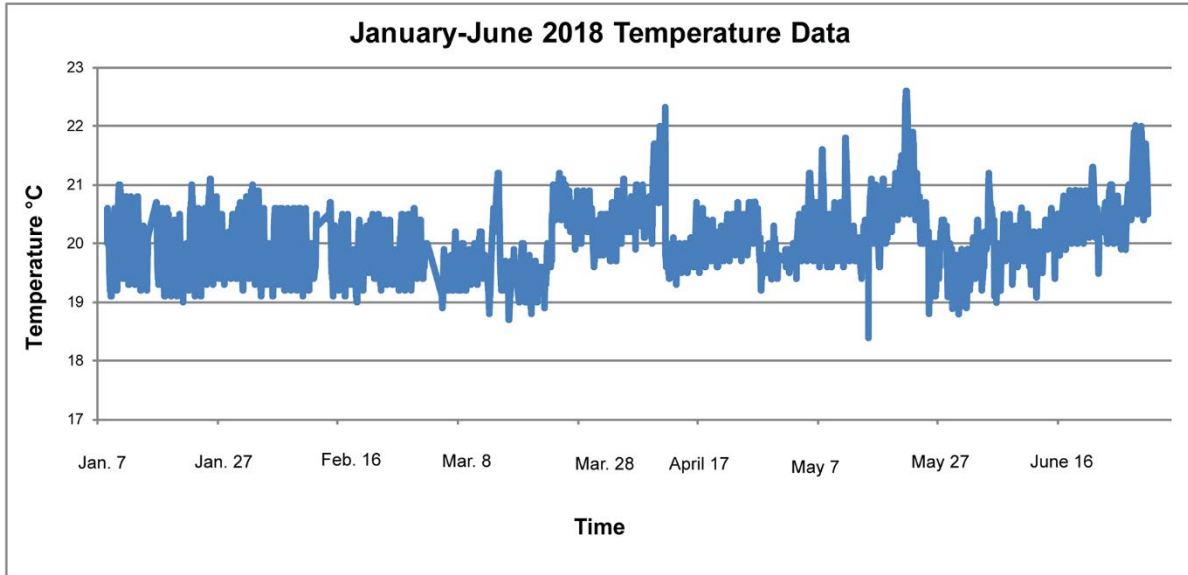

855  
856  
857  
858  
859  
860  
861  
862  
863  
864  
865  
866  
867  
868  
869  
870  
871  
872  
873  
874  
875  
876  
877  
878  
879  
880  
881

882 **Supplementary Figure 3 – Spirulina gradient.** To test which concentrations of spirulina  
883 cocktail can be fed safely to a box of 10 animals without rotting and spoiling the water,  
884 four boxes of 10 animals each were fed the following amounts of spirulina cocktail: 10, 25, 50 and  
885 100 mL. Images were taken directly after feeding, 24 hours later and 48 hours later.  
886

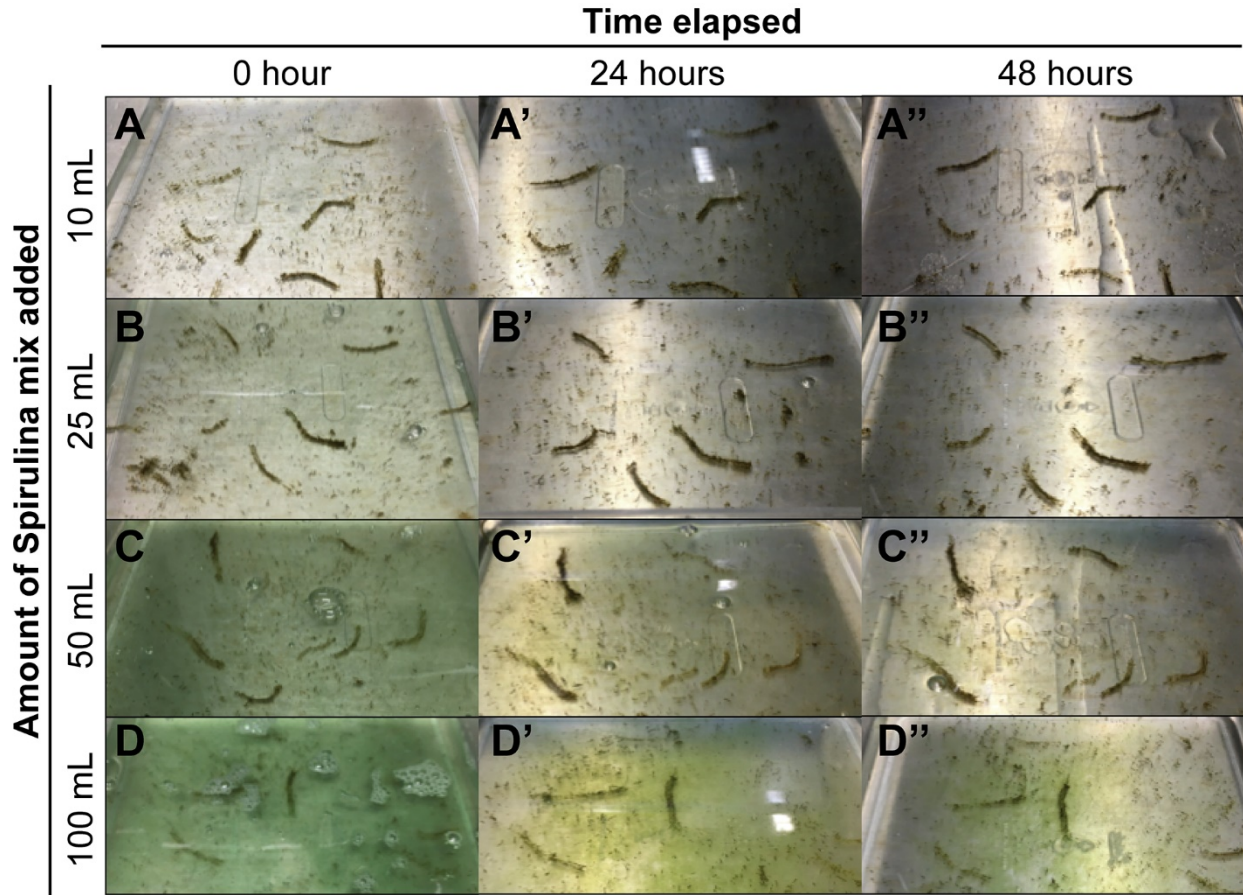

887  
888  
889  
890  
891  
892  
893  
894  
895  
896  
897  
898  
899  
900  
901  
902  
903  
904

905 **Supplementary Figure 4 - Number of worms in low density boxes.** The graph shows the  
906 number of worms living in low density cultures (30 worms/small Sterilite box) (for the period  
907 December 2017-August 2018). The number of mature animals found each cycle increased (Fig.  
908 9D) as more low density cultures were established. These numbers (along with mature animal  
909 numbers in Fig. 9) can be used as a guide to scale up or down low density culture boxes, for  
910 obtaining mature animal numbers desired.  
911  
912

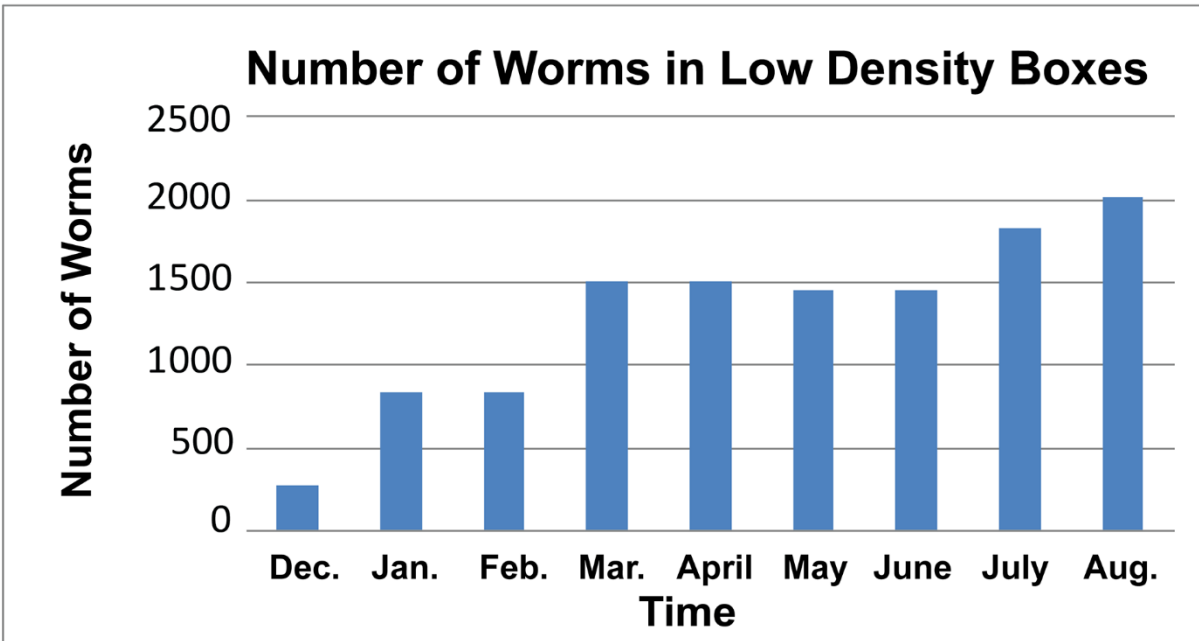

913  
914  
915  
916
